# Supplementary material for: Integrated pan-cancer gene expression and drug sensitivity analysis reveals SLFN11 mRNA as a solid tumor biomarker predictive of sensitivity to DNA-damaging chemotherapy
Source: PubMed Central journal article supplement (PMC6827986; doi:10.1371/journal.pone.0224267), 2019-11-04

**S3 Fig. Pathways analysis of sets of genes predictivity of drug sensitivity and resistance.** Genes listed in Table 2, which were correlated with sensitivity ( $R \leq -0.2$ ) or resistance ( $R \geq 0.2$ ) to >50% of drugs within a class in  $\geq 2$  databases (CTRP, GDSC, or NCI60), were evaluated by unsupervised sample-wise enrichment analysis using the hallmark gene set collection in Gene Set Variation Analysis (GSVA). Adjusted  $p$ -values are shown. Hallmark gene sets associated with drug sensitivity (solid shapes) and drug resistance (hollow shapes) are indicated.

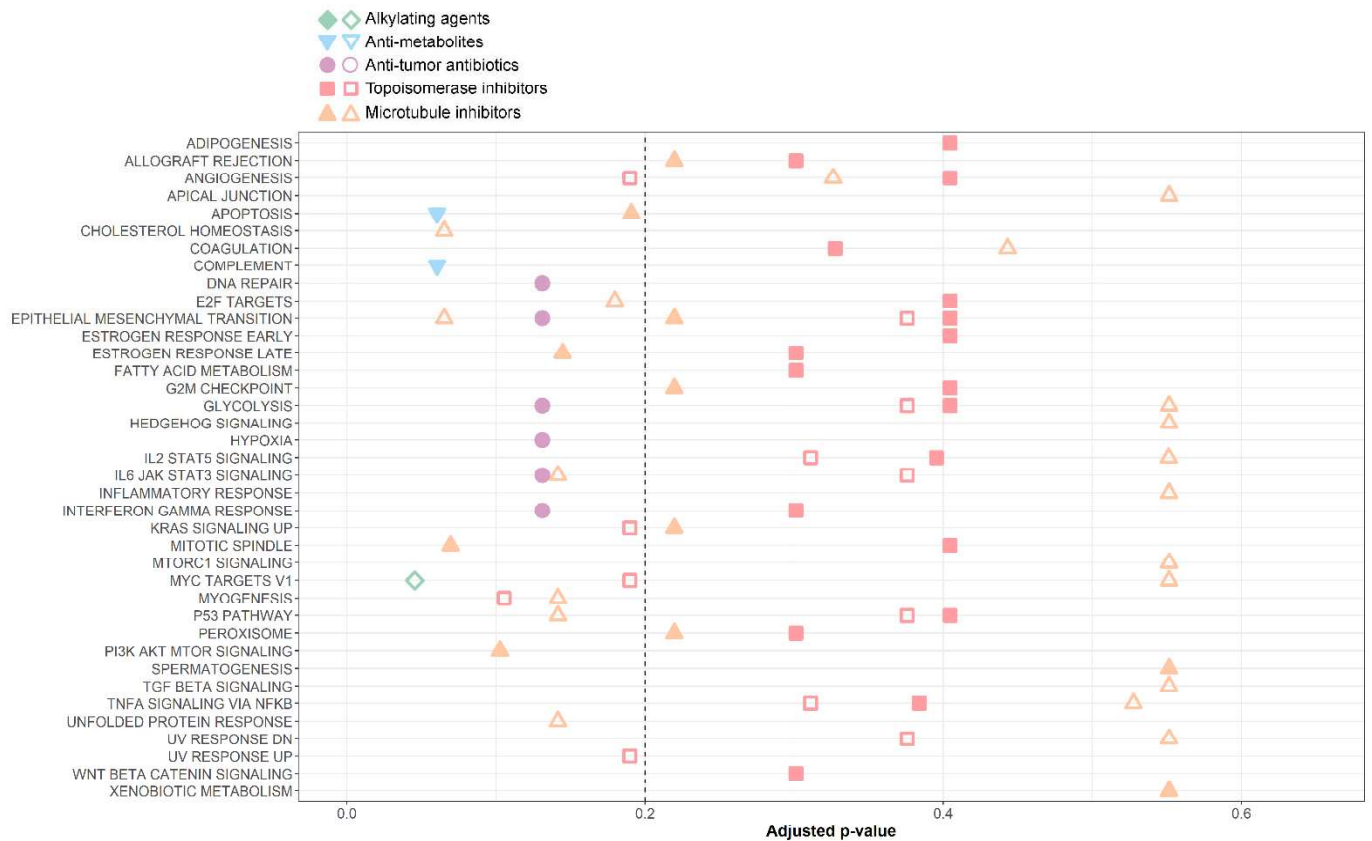

Supplement: pone.0224267.s003.pdf [file pone.0224267.s003.pdf]
