# Supplementary material for: Integrated pan-cancer gene expression and drug sensitivity analysis reveals SLFN11 mRNA as a solid tumor biomarker predictive of sensitivity to DNA-damaging chemotherapy
Source: PubMed Central journal article supplement (PMC6827986; doi:10.1371/journal.pone.0224267), 2019-11-04

**S4 Fig. SLFN11 mRNA expression in cancer cell lines is significantly correlated between datasets.**

Gene expression was downloaded from CTRP v2, GDSC, and NCI60 databases as previously described.

Each point represents a cell line overlapping between two databases: GDSC vs CTRP (A), CTRP vs NCI60

(B), and GDSC vs NCI60 (C). Pearson's correlations were performed. Solid line represents the best-fit

linear regression line, and dotted lines represent the 95% confidence interval.

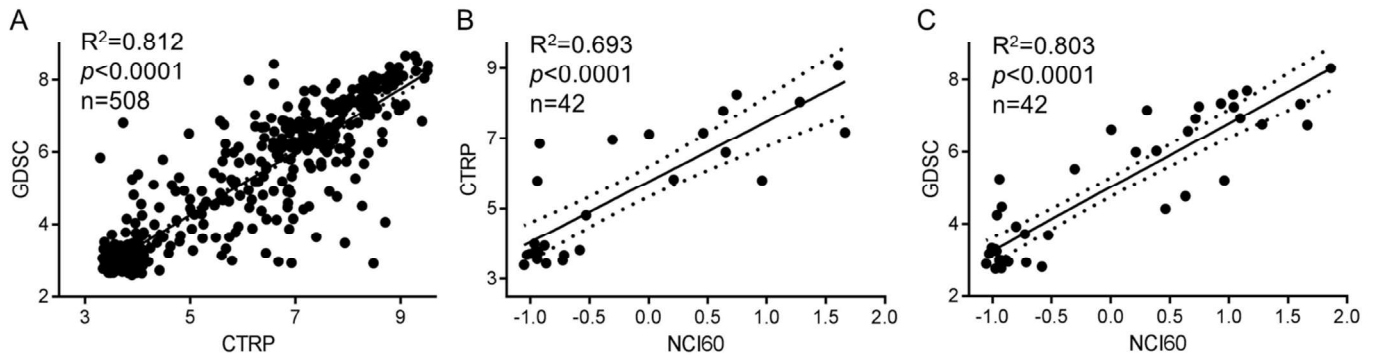

Supplement: pone.0224267.s004.pdf [file pone.0224267.s004.pdf]
