# Supplementary material for: Integrated pan-cancer gene expression and drug sensitivity analysis reveals SLFN11 mRNA as a solid tumor biomarker predictive of sensitivity to DNA-damaging chemotherapy
Source: PubMed Central journal article supplement (PMC6827986; doi:10.1371/journal.pone.0224267), 2019-11-04
Supplement: pone.0224267.s006.pdf [file pone.0224267.s006.pdf]

**S6 Fig- *SLFN11* mRNA expression is not predictive of overall survival in most cancer subtypes.** The OncoLnc tool [ <http://www.oncolnc.org/> ; Anaya (2016) OncoLnc: linking TCGA survival data to mRNAs, miRNAs, and lncRNAs. *PeerJ Computer Science* 2: e67] was used to determine whether *SLFN11* expression in primary tumors is associated with overall survival in TCGA datasets. Analyses of 21 cancer subtypes was available. p-values were corrected for all genes in the transcriptome. *SLFN11* levels were prognostic of shorter OS (FDR-corrected  $p \leq 0.05$ ) in 3/21 cancer subtypes.

| <u>Cancer type</u>                             | <u>TCGA type</u> | <u>FDR-corrected p-value</u> |
|------------------------------------------------|------------------|------------------------------|
| Bladder urothelial carcinoma                   | BLCA             | 0.309                        |
| Breast invasive carcinoma                      | BRCA             | 0.882                        |
| Cervical sq. cell carc. & endocerv. adenocarc. | CESC             | 0.804                        |
| Colon adenocarcinoma                           | COAD             | 0.558                        |
| Esophageal carcinoma                           | ESCA             | 0.988                        |
| Glioblastoma multiforme                        | GBM              | 0.8                          |
| Head & neck squamous cell carcinoma            | HNSC             | 0.594                        |
| Kidney renal clear cell carcinoma              | KIRC             | 0.022                        |
| Kidney renal papillary cell carcinoma          | KIRP             | 0.123                        |
| Acute myeloid leukemia                         | LAML             | 0.736                        |
| Brain lower grade glioma                       | LGG              | 0.023                        |
| Liver hepatocellular carcinoma                 | LIHC             | 0.654                        |
| Lung adenocarcinoma                            | LUAD             | 0.944                        |
| Lung squamous cell carcinoma                   | LUSC             | 0.567                        |
| Ovarian serous cystadenocarcinoma              | OV               | 0.978                        |
| Pancreatic adenocarcinoma                      | PAAD             | 0.938                        |
| Rectum adenocarcinoma                          | READ             | 0.932                        |
| Sarcoma                                        | SARC             | 0.505                        |
| Skin cutaneous melanoma                        | SKCM             | 0.002                        |
| Stomach adenocarcinoma                         | STAD             | 0.641                        |
| Uterine corpus endometrial carcinoma           | UCEC             | 0.883                        |
