# Supplementary material for: Integrated pan-cancer gene expression and drug sensitivity analysis reveals SLFN11 mRNA as a solid tumor biomarker predictive of sensitivity to DNA-damaging chemotherapy
Source: PLoS One. 2019 Nov 4;14(11):e0224267. doi: 10.1371/journal.pone.0224267 (PMC6827986; doi:10.1371/journal.pone.0224267)

**S2 Fig. SLFN11 mRNA levels are strongly correlated with sensitivity to chemotherapeutics in cancer cells.** A) SLFN11 mRNA levels were compared with drug sensitivity (AUC) in the GDSC dataset by Pearson correlation. Each point represents one drug. Mean  $\pm$  SEM for each drug class is shown. B-E) Waterfall plots show Pearson's R for the correlations between SLFN11 mRNA expression and AUC or IC<sub>50</sub> for each chemotherapeutic in GDSC, CTRP, and NCI60 datasets. Bars are color-coded according to drug class: green = topoisomerase inhibitor; blue = anti-tumor antibiotic; purple = antimetabolite; red = cytoskeleton inhibitor; orange = alkylating agent. Summarized data are shown in Fig. 1B and panel (A) in this supplemental figure.

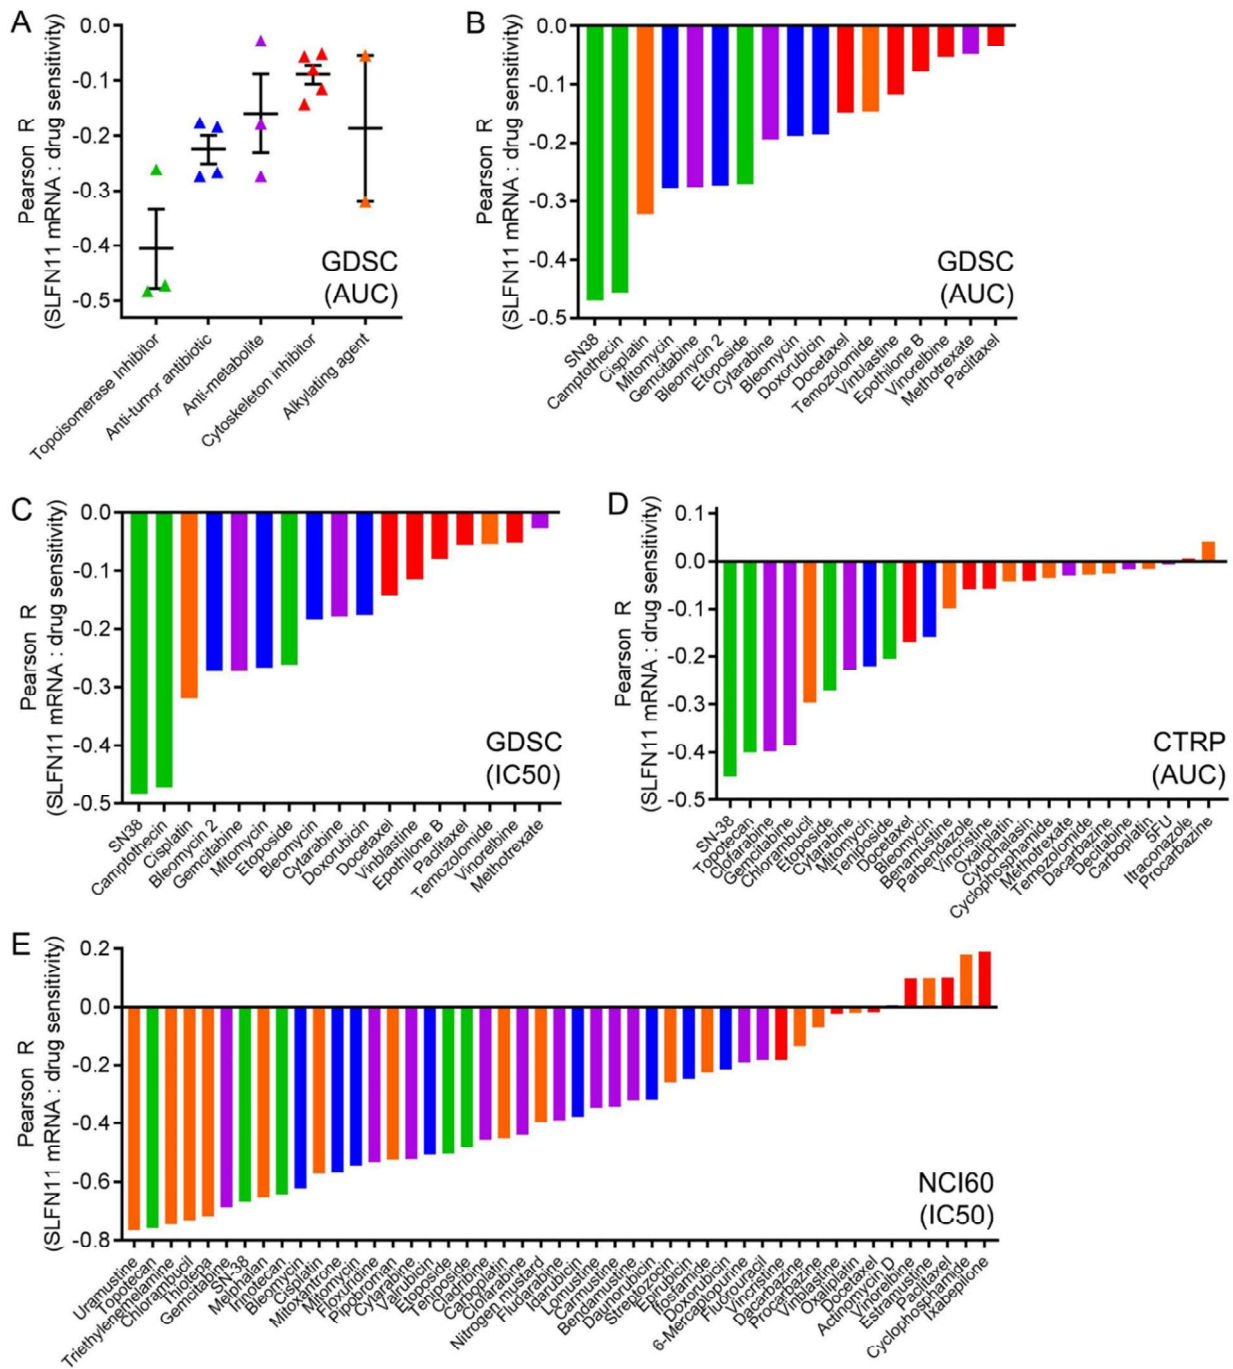

Supplement: S2 Fig — A) SLFN11 mRNA levels were compared with drug sensitivity (AUC) in the GDSC dataset by Pearson correlation. Each point represents one drug. Mean ± SEM for each drug class is shown. B-E) Waterfall plots show Pearson’s R for the correlations between SLFN11 mRNA expression and AUC or IC50 for each chemotherapeutic in GDSC, CTRP, and NCI60 datasets. Bars are color-coded according to drug class: green = topoisomerase inhibitor; blue = anti-tumor antibiotic; purple = antimetabolite; red = cytoskeleton inhibitor; orange = alkylating agent. Summarized data are shown in Fig 1B and panel (A) in this supplemental figure. (PDF) [file pone.0224267.s002.pdf]
